# Supplementary material
Source: PubMed Central journal article supplement (PMC4028090)
Supplement: Supp_Fig1.pdf [file Supp_Fig1.pdf]

## Supplementary Data

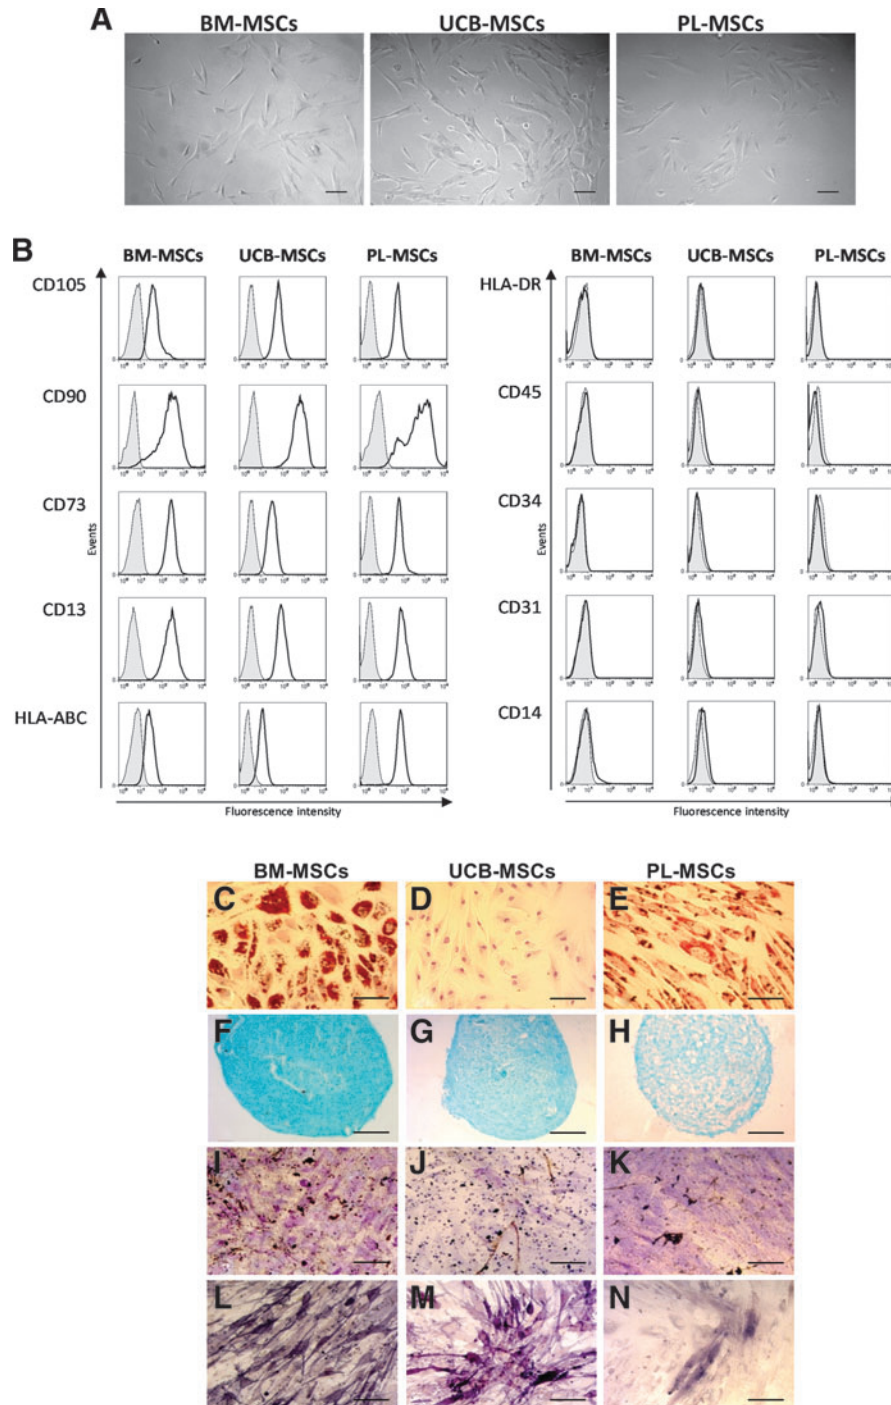

**SUPPLEMENTARY FIG. S1.** Functional characterization of MSCs from BM, UCB, and PL. **(A)** Appearance under the microscope of morphology of MSCs cells, observed in cultures from the indicated sources. Scale bar 100  $\mu$ m (magnification 10 $\times$ ). **(B)** Immunophenotype of MSCs cells. Cells were stained with FITC, PE, or APC-conjugated monoclonal antibodies against CD105, CD90, CD73, CD13, HLA-ABC, HLA-DR, CD45, CD34, CD31, CD14, or immunoglobulin isotype control antibodies. Cells were analyzed on a Coulter Epics Altra Flow Cytometer. Representative histograms for the indicated cell markers are shown. **(C–N)** MSCs from the three sources (BM  $n=5$ , UCB  $n=5$ , and PL  $n=5$ ) were cultured in the adipogenic, chondrogenic, and osteogenic induction medium for 14, 21, and 28 days, respectively. **(C–E)** Adipogenic differentiation was indicated by accumulation of neutral lipid vacuoles that stained with Oil Red O. Scale bar 100  $\mu$ m (magnification 20 $\times$ ). **(F–H)** Chondrogenic differentiation was indicated by the chondrogenic matrix colored by Alcian blue in cryosections from pelleted micromass. Scale bar 100  $\mu$ m (magnification 20 $\times$ ). **(I–N)** Osteogenic differentiation was indicated by calcium deposition, which stained with von Kossa dye **(I–K)** and alkaline phosphatase staining **(L–N)**. Scale bar 100  $\mu$ m (magnification 20 $\times$ ). One representative experiment is shown. BM, bone marrow; MSCs, mesenchymal stromal cells; PL, placenta; UCB, umbilical cord blood; HLA, human leukocyte antigen.
