# Supplementary material
Source: PubMed Central journal article supplement (PMC4028090)
Supplement: Supp_Fig2.pdf [file Supp_Fig2.pdf]

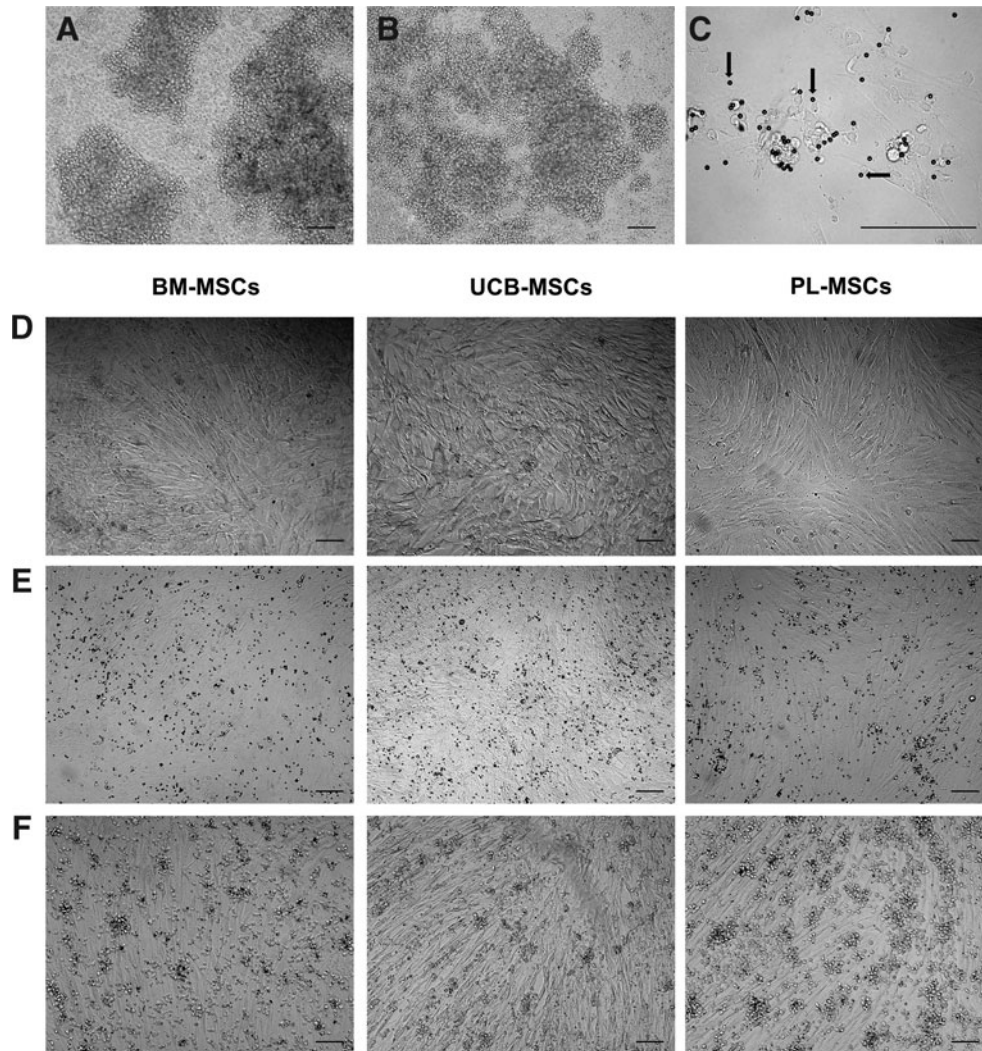

**SUPPLEMENTARY FIG. S2.** Microscopic pictures of the T cells and MSCs seeded in cultures and cocultures. **(A)** Representative image of T-cell proliferation in absence of MSCs at 4 days of culture in a 24-well plate. Scale bar 100  $\mu\text{m}$  (magnification 10 $\times$ ). **(B)** Representative image of T-cell proliferation in cocultures with MSCs at 4 days of culture in a 24-well plate with transwell at 1:1 ratio of MSCs:T cells. Scale bar 100  $\mu\text{m}$  (magnification 10 $\times$ ). **(C)** Appearance under the microscope of microbeads CD3/CD28 T-cell expander of 4.5  $\mu\text{m}$  of size (indicated by *arrows*). Microbeads are easily visible by optic microscopy at 4 days of culture without evidence of phagocytosis. Scale bar 100  $\mu\text{m}$  (magnification 40 $\times$ ). **(D)** Appearance of cultures of  $1 \times 10^5$  MSCs from indicated sources at 24 h after seeded and previous to coculture with T cells. Scale bar 100  $\mu\text{m}$  (magnification 10 $\times$ ). **(E)** Cocultures of activated T cells in presence of MSCs from indicated source at 24 h at 1:1 ratio of MSCs:T cells. Scale bar 100  $\mu\text{m}$  (magnification 10 $\times$ ). **(F)** Cocultures of activated T cells in presence of MSCs from indicated source at 4 days at a 1:1 ratio of MSCs:T cells. Scale bar 100  $\mu\text{m}$  (magnification 10 $\times$ ).
